# Supplementary material for: Peripheral huntingtin silencing does not ameliorate central signs of disease in the B6.HttQ111/+ mouse model of Huntington’s disease
Source: PubMed Central journal article supplement (PMC5409169; doi:10.1371/journal.pone.0175968), 2017-04-28

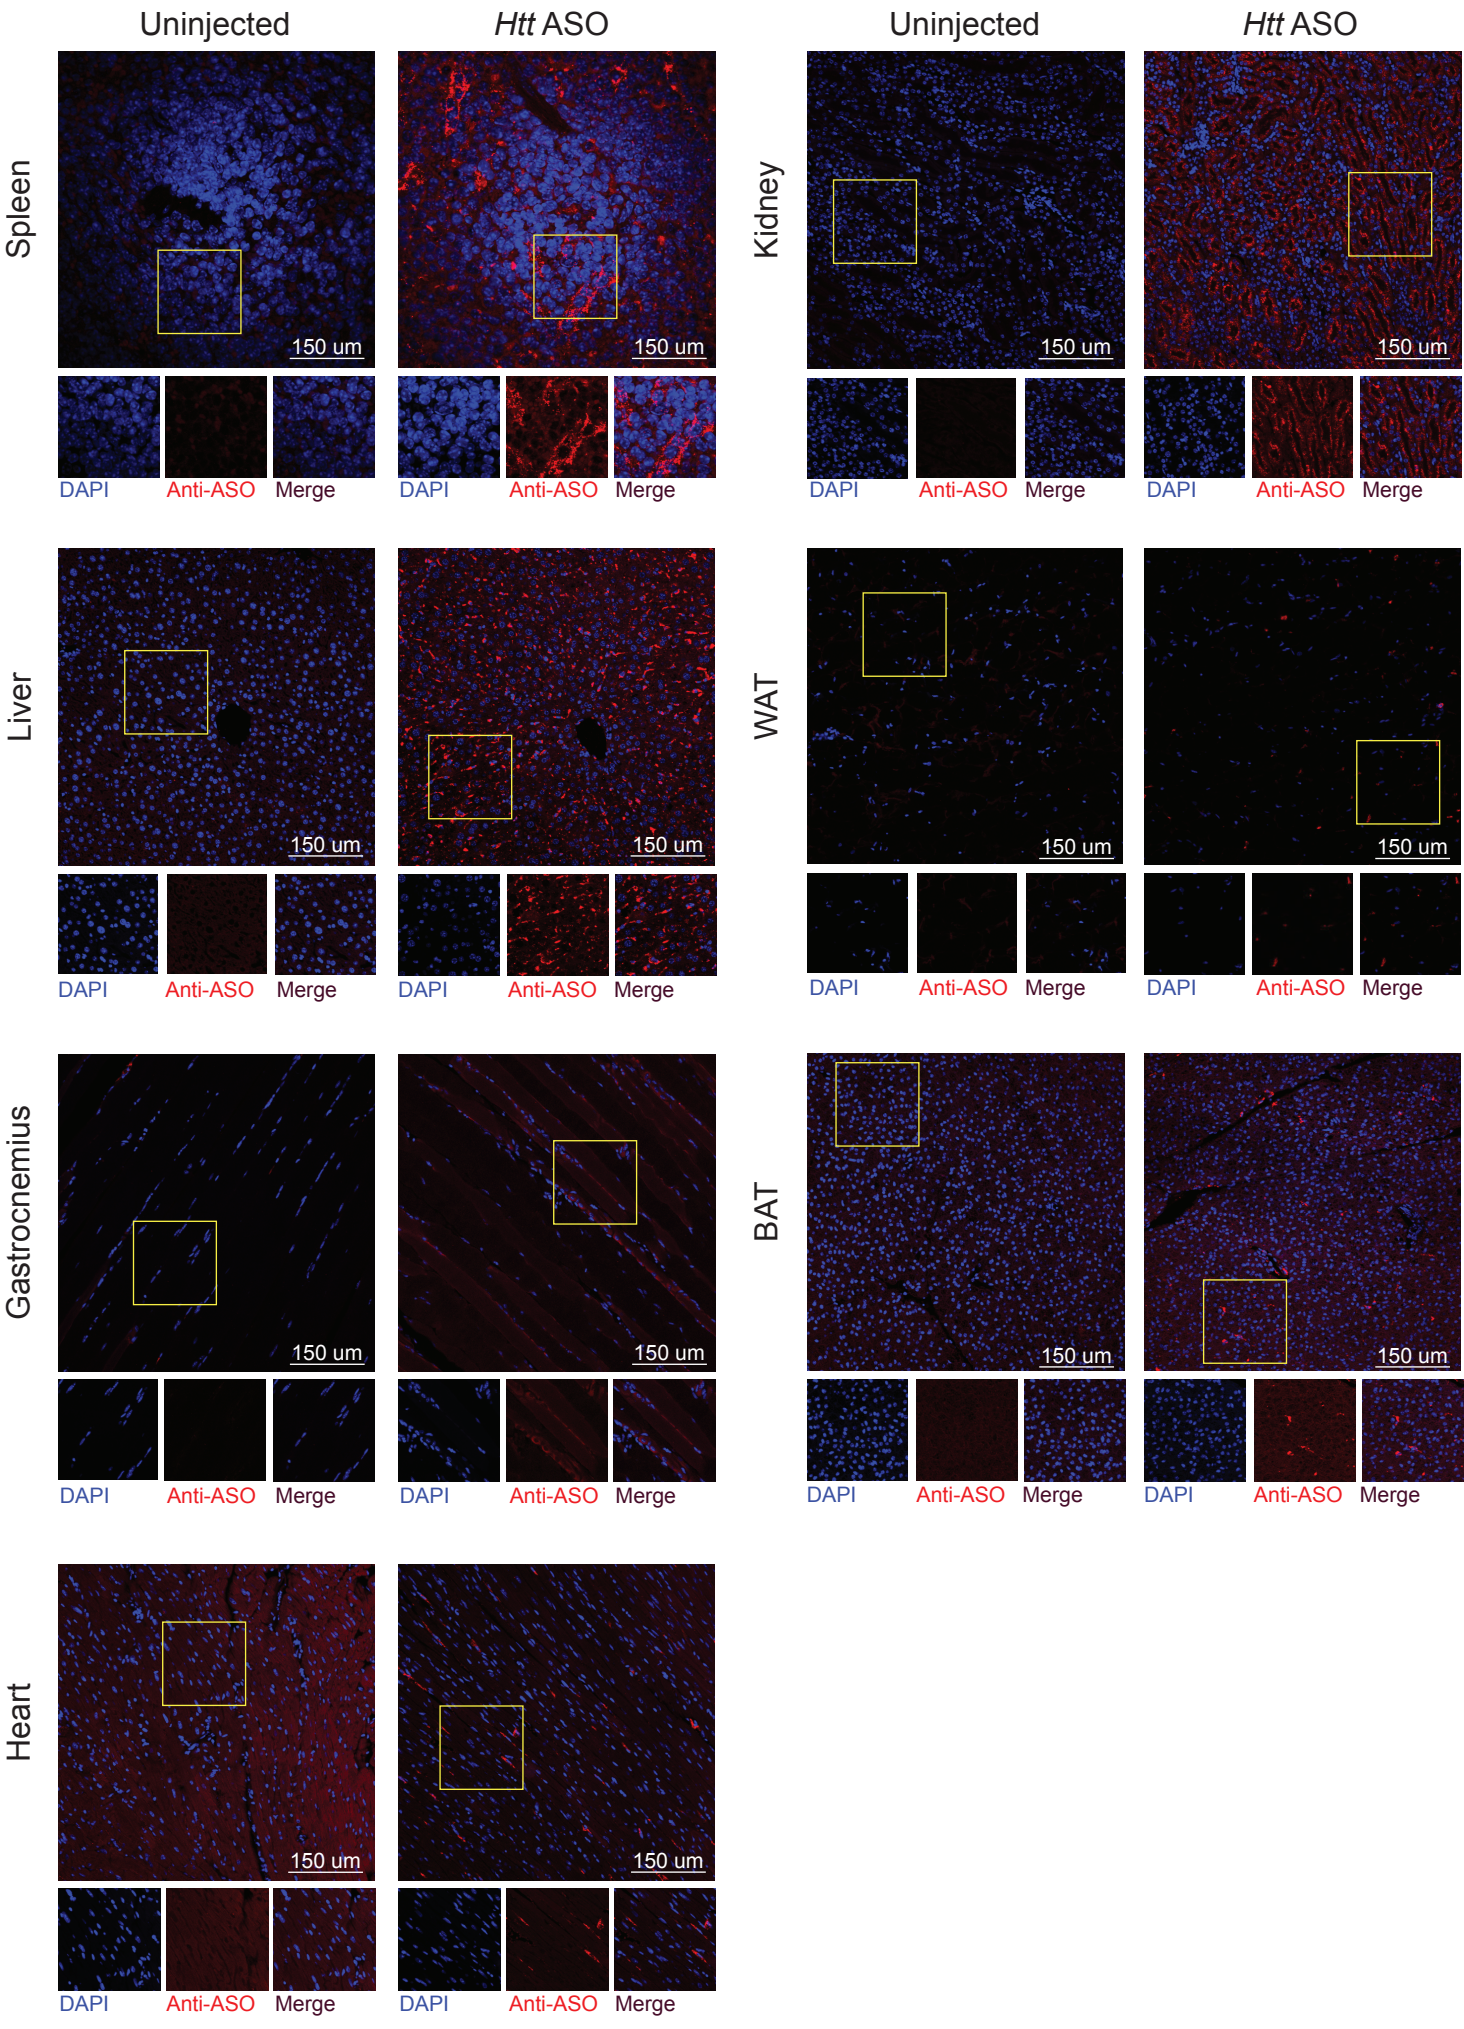

Supplement: pone.0175968.s004.pdf [file pone.0175968.s004.pdf]
