# Supplementary material for: Peripheral huntingtin silencing does not ameliorate central signs of disease in the B6.HttQ111/+ mouse model of Huntington’s disease
Source: PubMed Central journal article supplement (PMC5409169; doi:10.1371/journal.pone.0175968), 2017-04-28
Supplement: pone.0175968.s006.pdf [file pone.0175968.s006.pdf]

1     Peripheral huntingtin silencing does not ameliorate  
2     central signs of disease in the B6.*Htt*<sup>Q111/+</sup> mouse  
3             model of Huntington's disease

4     Sydney R. Coffey <sup>1</sup>, Robert M. Bragg <sup>1</sup>, Shawn Minnig <sup>1</sup>, Seth A. Ament <sup>2,3</sup>, Jeffrey P.  
5     Cantle <sup>1</sup>, Anne Glickenhau <sup>1</sup>, Daniel Shelnut <sup>4</sup>, José M. Carrillo <sup>1</sup>, Dominic D.  
6     Shuttleworth <sup>1</sup>, Julie-Anne Rodier <sup>5</sup>, Kimihiro Noguchi <sup>4</sup>, C. Frank Bennett <sup>6</sup>, Nathan D.  
7     Price <sup>2</sup>, Holly B. Kordasiewicz <sup>6</sup> and Jeffrey B. Carroll <sup>1,\*</sup>

8     <sup>1</sup> Behavioral Neuroscience Program, Psychology Department, Western Washington  
9     University, Bellingham, WA, USA

10    <sup>2</sup> Institute for Genome Sciences and Department of Psychiatry, University of Maryland  
11    School of Medicine, Baltimore, MD, USA

12    <sup>3</sup> Institute for Systems Biology, Seattle, WA, USA

13    <sup>4</sup> Department of Mathematics, Western Washington University, Bellingham, WA, USA

14    <sup>5</sup> INSERM U1216, Grenoble Institute of Neuroscience, Grenoble, France.

15    Université Grenoble Alpes, Grenoble, France.

16    <sup>6</sup> Ionis Pharmaceuticals, Carlsbad, CA, USA

17

18    \* Corresponding author

19    Jeff.Carroll@wwu.edu (J.B.C.)

20

## 21 **Results**

### 22 **Dose-response and washout studies**

23           We piloted four different doses of *Htt* ASO and qualitatively assessed HTT  
24 knockdown by western blotting. At the two highest doses, no HTT could be detected,  
25 despite robust HTT signal in protein lysates extracted from off target ASO and  
26 uninjected mice (Figure in S1 Figure). Therefore we selected 50 mg per kg body mass  
27 (mpk) per week as the dose for the efficacy study; this was the minimal dose at which  
28 complete HTT knockdown was observed.  $\beta$ -Actin was used as a loading control and  
29 was successfully detected in all samples regardless of treatment.

30           To determine how frequently *Htt* ASO must be administered in order to maintain  
31 constant HTT knockdown, we conducted a washout study. Wild type mice were given  
32 weekly injections of *Htt* ASO or off target ASO for three weeks and sacrificed every  
33 other day for 24 days. During this time, we observed complete HTT silencing for 14  
34 days after cessation of treatment (Figure in S2 Figure), and even 24 days after the final  
35 injection, HTT did not recover to physiological levels. For the efficacy trial, we chose to  
36 conservatively administer *Htt* ASO via weekly injections.

## 37 **HTT knockdown in interim silencing cohorts**

38           At two points midway through the efficacy trial, we confirmed HTT knockdown in  
39 three peripheral tissues of interest: liver, perigonadal white adipose tissue, and  
40 interscapular brown adipose tissue. HTT levels were quantified via mesoscale discovery  
41 (MSD) assays, as described in the primary manuscript. No differences in mutant or total  
42 HTT suppression patterns were observed between timepoints, therefore data were  
43 grouped for statistical analysis. *Htt* ASO treatment had a significant effect on total HTT  
44 levels (Figure in S3 Figure) in all three tissues (effect of treatment in the liver:  $F_{(2, 18)} =$   
45  $9.8$ ,  $p = 1.8 \times 10^{-3}$ , white adipose tissue:  $F_{(2, 18)} = 15.7$ ,  $p = 1.2 \times 10^{-4}$ , and brown adipose  
46 tissue:  $F_{(2, 18)} = 11.3$ ,  $p = 6.5 \times 10^{-4}$ ). As expected, Tukey's HSD *post hoc* comparisons  
47 revealed *Htt* ASO treatment suppressed HTT compared to both control ASO (liver:  $p =$   
48  $8.8 \times 10^{-3}$ , white adipose tissue:  $p = 3.1 \times 10^{-3}$ , and brown adipose tissue:  $p = 2.2 \times 10^{-3}$ )  
49 and saline treatment (liver:  $p = 2.6 \times 10^{-3}$ , white adipose tissue:  $p = 1 \times 10^{-4}$ , and brown  
50 adipose tissue:  $p = 1.4 \times 10^{-3}$ ). Similarly, mHTT was significantly reduced by *Htt* ASO  
51 treatment in all tissues quantified (effect of treatment in the liver:  $F_{(2, 18)} = 36.8$ ,  $p = 4.4 \times$   
52  $10^{-7}$ , white adipose tissue:  $F_{(2, 18)} = 9.6$ ,  $p = 1.4 \times 10^{-3}$ , and brown adipose tissue:  $F_{(2, 18)}$   
53  $= 5.6$ ,  $p = 0.01$ ). Tukey's HSD *post hoc* tests verified reduction of mHTT following *Htt*  
54 ASO treatment compared to saline treatment (liver:  $p = 1.2 \times 10^{-6}$ , white adipose tissue:  
55  $p = 1.0 \times 10^{-3}$ , and brown adipose tissue:  $p = 0.01$ ). Interestingly, no difference in mHTT  
56 levels was observed by Tukey's HSD *post hoc* comparisons between *Htt* ASO and  
57 control ASO treatment in either of the adipose tissues (white adipose tissue:  $p = 0.16$ ,  
58 and brown adipose tissue:  $p = 0.11$ ), despite *Htt* ASO treatment reducing mHTT levels  
59 relative to control treatment in the liver ( $p = 3.5 \times 10^{-6}$ ).

## 60 **Methods**

### 61 **Mice**

62           In order to determine an appropriate ASO dose and frequency of administration,  
63 we conducted dose-response (n = 5 per arm, total N = 30) and washout studies (n = 1  
64 per arm, total N = 24) in male, wild-type C57BL/6J mice (stock no. 000664) acquired  
65 from the Jackson Laboratories (Bar Harbor, ME). Mice were housed under standard  
66 vivarium conditions with *ad libitum* access to food and water. After shipment, mice  
67 habituated to local vivarium conditions for at least two weeks prior to every study. For  
68 both the washout and dose-response studies, treatment began at three months of age  
69 and continued for three weeks. For the dose-response study, mice were sacrificed two  
70 days after the final injection as described in the primary manuscript. For the washout  
71 study, mice were sacrificed every other day after cessation of treatment.

72           ASO uptake in peripheral tissues was qualitatively assessed in a small cohort  
73 made up of female, C57BL/6J mice bred locally (n = 2 per arm, total N = 4). Mice in the  
74 tissue distribution cohort were maintained with *ad libitum* access to food and water.  
75 Treatment began at 4 months ( $121 \pm 1$  days) of age and continued for four weeks. At 5  
76 months ( $147 \pm 4$  days) of age, or two days after cessation of treatment, mice were  
77 sacrificed via intraperitoneal injection of at least 250 mpk sodium pentobarbital and  
78 transcardially perfused with phosphate buffered saline (PBS). Liver, perigonadal white  
79 adipose tissue (WAT), interscapular brown adipose tissue (BAT), kidney, spleen, heart,  
80 and gastrocnemius were dissected and fixed overnight in 10% neutral buffered formalin.

81 All procedures were reviewed and approved by the animal care and use committee at  
82 Western Washington University (protocol 14-006).

## 83 **Antisense Oligonucleotide Administration**

84 In an initial dose-response study, we administered a pan-*Htt* targeted ASO (Ionis  
85 419637, *Htt* ASO) via weekly IP injection at four different doses: 17.9, 35.8, 50, or 100  
86 mpk. As a control, an off target ASO was administered weekly at 35.8 mpk. The off  
87 target ASO was selected as a control because it shares a similar chemical structure  
88 with *Htt* ASO, both of which are 20 nucleotide 5'-10-5 2'-methoxyethyl gapmers. In  
89 addition, we compared both *Htt* ASO and off target ASO treated mice to uninjected  
90 mice. Based on this initial dose-response study, we selected a dose of 50 mpk per week  
91 for all subsequent studies.

92 To roughly characterize *Htt* ASO duration of action, we conducted a washout  
93 study in which mice were treated with *Htt* ASO or off target ASO at 35.8 mpk per week  
94 for three weeks. After cessation of treatment, mice were sacrificed every other day for  
95 24 days and HTT levels quantified by western blot.

96 For the tissue distribution study, mice received weekly injections of *Htt* ASO at 50  
97 mpk for four weeks.

## 98 **Immunoblotting**

99 Tissue (half of dissected brown adipose tissue and 35 - 55 mg of liver tissue) was  
100 transferred to BeadBug tubes prefilled with 1.5-mm zirconium oxide beads (Benchmark)  
101 and homogenized for 2 minutes at 4,000 rpm using the BeadBug Microtube

102 Homogenizer (Benchmark). Protein was extracted using 450  $\mu$ L of RIPA buffer (150 mM  
103 NaCl, 25 mM Tris-HCl, 1% NP-40, 1% sodium deoxycholate, 0.1% SDS) containing  
104 protease and phosphatase inhibitors (Thermo Fisher Scientific). Concentration of  
105 protein lysates was determined by Pierce BCA assay (Thermo Fisher Scientific)  
106 according to the manufacturer's protocol.

107 Total HTT levels were quantified via western blotting. Equal amounts of protein  
108 were loaded into 3-8% Tris-Acetate Mini Gels (Thermo Fisher Scientific) and separated  
109 electrophoretically by molecular weight. Protein was transferred at 4°C for 17 – 20 hours  
110 to a PVDF membrane.

111 Western blot assay membranes were blocked for 1 hour at room temperature  
112 using Odyssey Blocking Buffer (LiCor) before incubating for 1 hour at room temperature  
113 or overnight at 4°C in primary antibodies. Monoclonal primary antibodies were diluted  
114 1:1,000 in Odyssey blocking buffer plus 0.2% tween and consisted of mouse anti-HTT  
115 (EMD Millipore: MAB2166; Ab\_2123255) and rabbit anti- $\beta$ -Actin (Cell Signalling:  
116 mAB#8457, Ab\_10950489). Membranes were rinsed three times in PBS plus 0.05%  
117 tween (PBST), then incubated in secondary antibodies for 1 hour at room temperature.  
118 Polyclonal secondary antibodies were IRDye 800CW conjugated goat anti-mouse IgG  
119 (LiCor: 926-32210; Ab\_621842) and IRDye 680RD conjugated goat anti-rabbit IgG  
120 (LiCor: 926-68071; Ab\_10956166) diluted 1:15,000 in Odyssey Blocking Buffer plus  
121 0.2% tween and 0.01% SDS. After rinsing three times in PBST, membranes were  
122 washed in PBS before imaging for 2 minutes each at 700 and 800 nm.

## 123 **Immunohistochemistry and Imaging**

124           As part of the tissue distribution study, formalin-fixed liver, WAT, BAT,  
125 gastrocnemius, heart, spleen, and kidney tissues were paraffin embedded, cut into 5-  
126  $\mu\text{m}$  sections, and mounted on glass slides at Histology Consultation Services (Everson,  
127 WA). Sections were deparaffinized and heat mediated antigen retrieval was conducted  
128 in Tris-EDTA buffer before staining overnight in anti-ASO primary antibody (1:1,000) at  
129 4°C. Sections were stained in goat anti-rabbit secondary antibody conjugated to  
130 Alexa568 (1:1,000) for one hour at room temperature and mounted with DAPI  
131 Fluoromount-G (Southern Biotech). All confocal images were acquired with an IX-81  
132 laser-scanning confocal microscope using Fluoview 1000 software (Olympus). Image  
133 processing and analysis was performed as described [1].

## 134 **References**

- 135 1. Bragg RM, Coffey SR, Weston RM, Ament SA, Cattle JP, Minnig S, et al.  
136 Motivational, proteostatic and transcriptional deficits precede synapse loss, gliosis  
137 and neurodegeneration in the B6.Htt(Q111/+) model of Huntington's disease. Sci  
138 Rep. 2017;7: 41570.

139
