# Supplementary material for: Peripheral huntingtin silencing does not ameliorate central signs of disease in the B6.HttQ111/+ mouse model of Huntington’s disease
Source: PLoS One. 2017 Apr 28;12(4):e0175968. doi: 10.1371/journal.pone.0175968 (PMC5409169; doi:10.1371/journal.pone.0175968)
Supplement: S2 Fig — To roughly characterize the duration of action of our chosen ASO, we performed three, weekly IP injections of Htt ASO or off target ASO and measured liver HTT levels every other day for 24 days. Due to gel constraints, samples could not be loaded on a single gel, therefore days 2–12 are shown in (A) and days 14–24 are shown in (B). Based on these observations, we concluded weekly IP injections of Htt ASO were sufficient to ensure no recovery of HTT levels between treatments. Abbreviations: positive loading control (LC), HTT: huntingtin protein (HTT), β-Act: β-Actin (β-Act). (PDF) [file pone.0175968.s002.pdf]

Western blot analysis of HTT protein levels in Htt ASO (35.8 mpk) and Off target ASO (35.8 mpk) treated mice. The blot shows protein bands at 460 kDa, 268 kDa, 238 kDa, 170 kDa, 71 kDa, 55 kDa, 41 kDa, and 31 kDa. The Htt ASO treated mice show a significant reduction in the 170 kDa band compared to the Off target ASO treated mice. The 41 kDa band is labeled as  $\beta$ -Act.

Western blot analysis of HTT protein levels in the brain after ASO treatment. The blot shows protein bands for HTT (460 kDa, 268 kDa, 238 kDa),  $\beta$ -Actin (41 kDa, 31 kDa), and other markers (170 kDa, 71 kDa, 55 kDa). The lanes are labeled: LC, *Htt* ASO (35.8 mpk), and Off target ASO (35.8 mpk). The *Htt* ASO lanes show a significant reduction in HTT protein levels compared to the LC and Off target ASO lanes. The  $\beta$ -Actin loading control shows consistent protein loading across all lanes.
